# Supplementary material for: The search for rigid, tough polyesters with high T g – renewable aromatic polyesters with high isosorbide content
Source: Royal Society of Chemistry journal article supplement (doi:10.1039/d4su00294f), 2024-01-01
Supplement: d4su00294f1.pdf [file d4su00294f1.pdf]

## The search for rigid, tough polyesters with high $T_g$ - Renewable aromatic polyesters with high isosorbide content

Bruno Bottega Pergher<sup>a</sup>, Daniel H. Weinland<sup>a</sup>, Robert-Jan van Putten<sup>b</sup> and Gert-Jan M. Gruter<sup>\*a,b</sup>

### Supporting information

<sup>a</sup> Industrial Sustainable Chemistry, van 't Hoff Institute of molecular sciences, University of Amsterdam, University of Amsterdam, Science Park 904, 1098 XH Amsterdam, The Netherlands.

<sup>b</sup> Avantium N.V., Zekeringstraat 29, 1014 BV Amsterdam, The Netherlands;†

\* corresponding author: G.J.M.Gruter@uva.nl

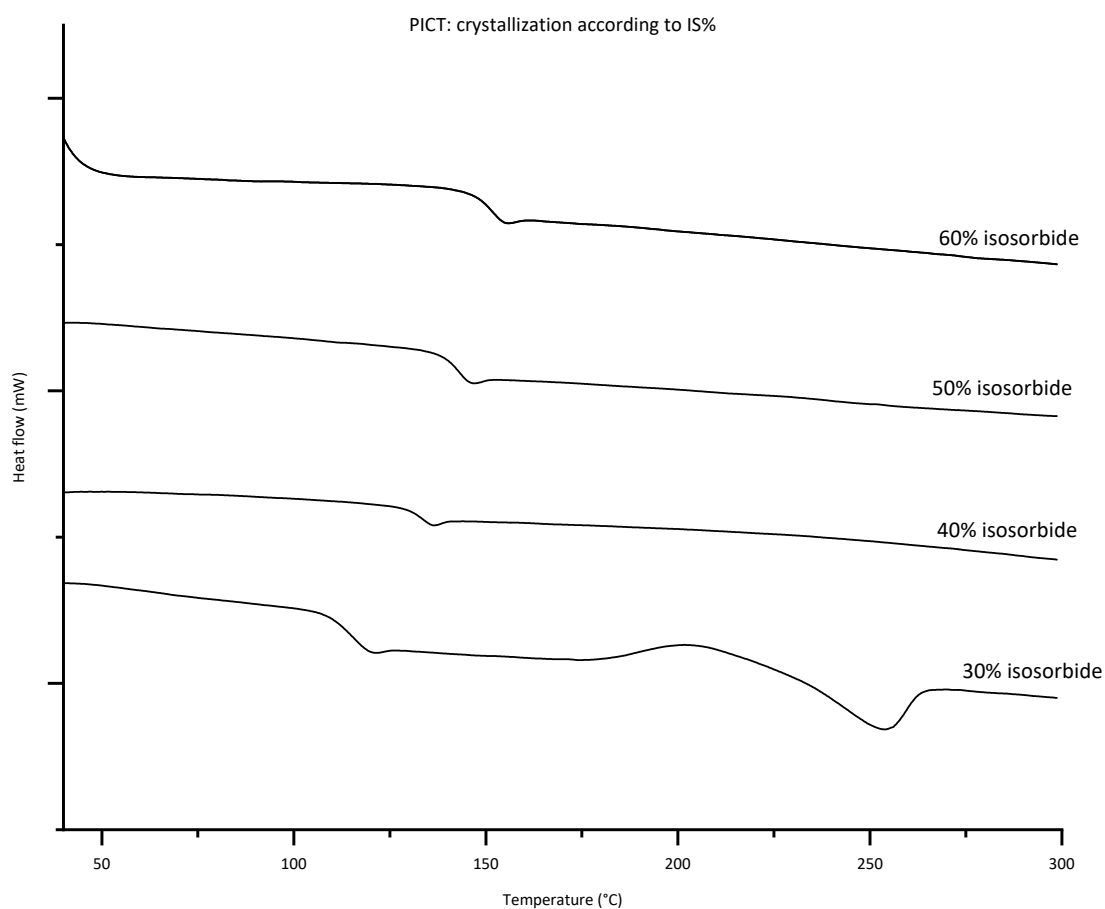

Figure 1 - DSC graphs of PICT with different isosorbide composition.

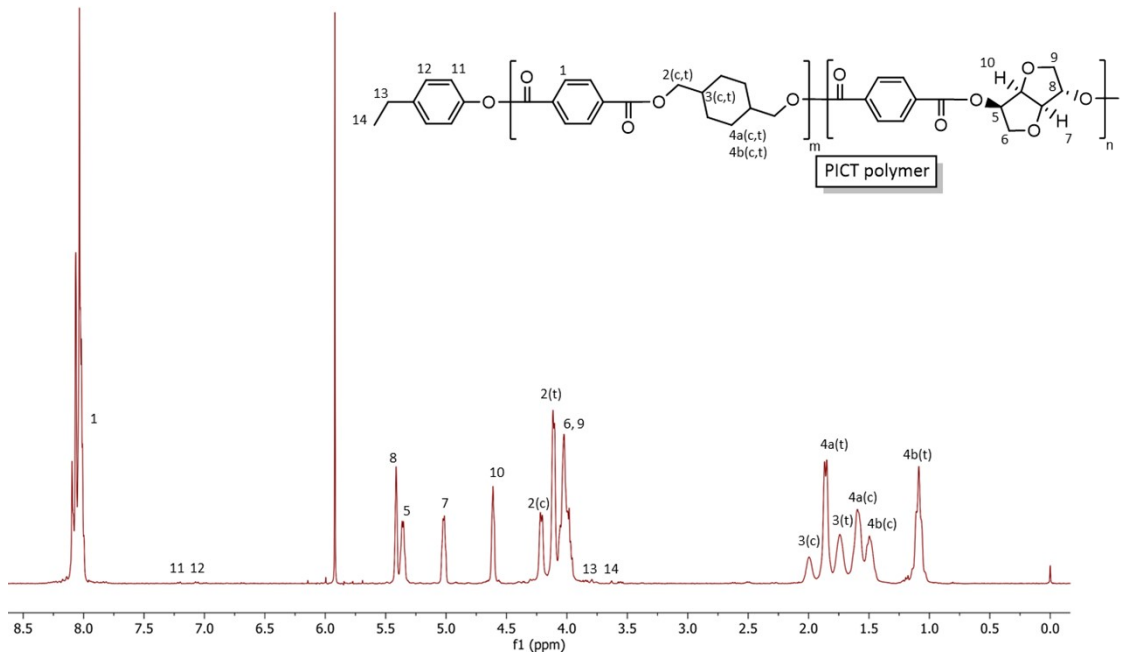

m n

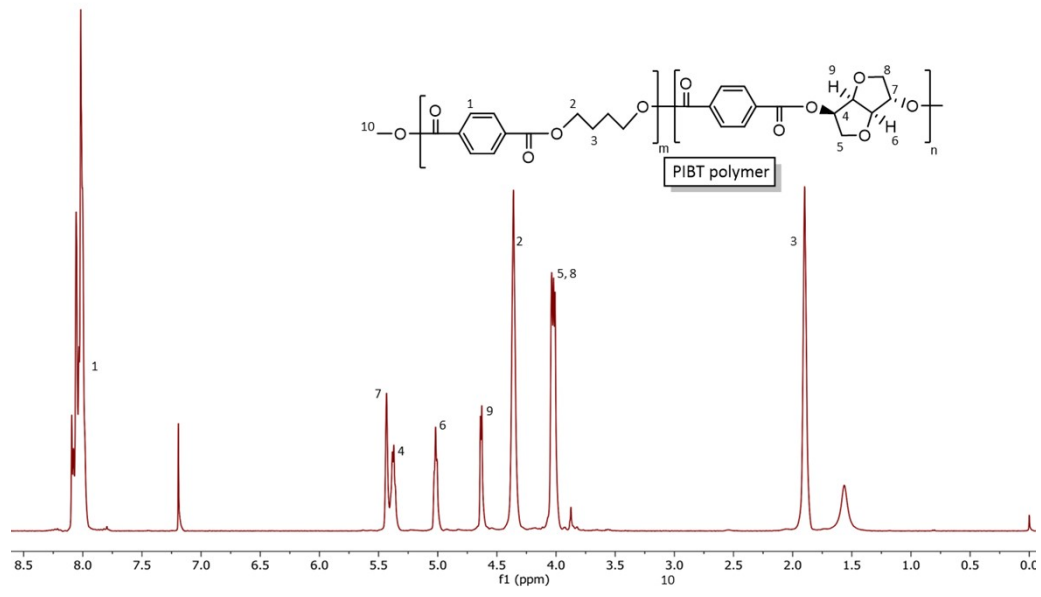

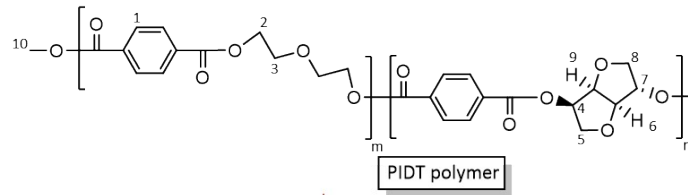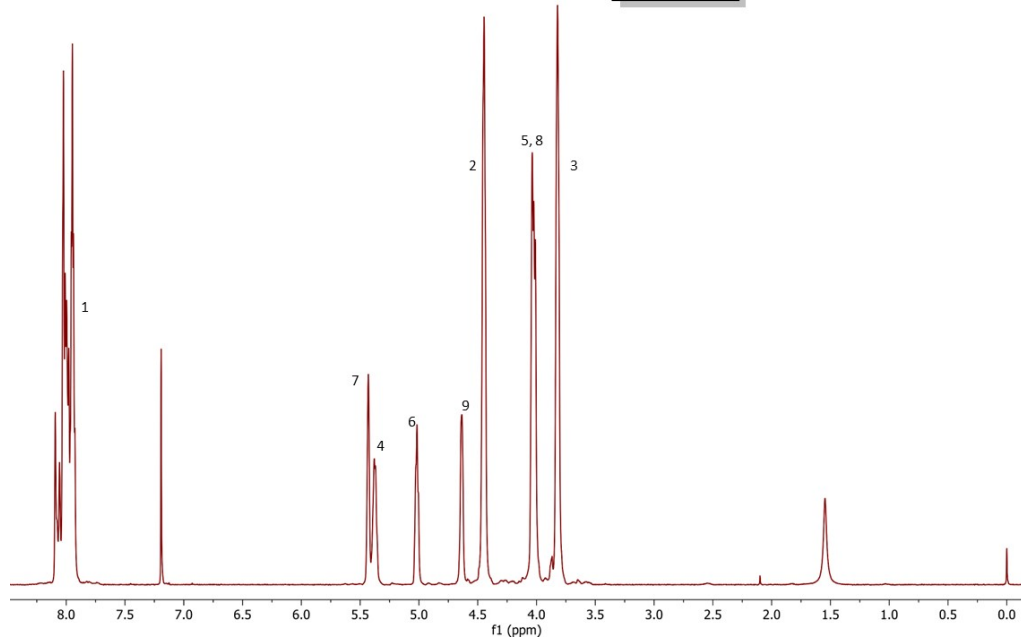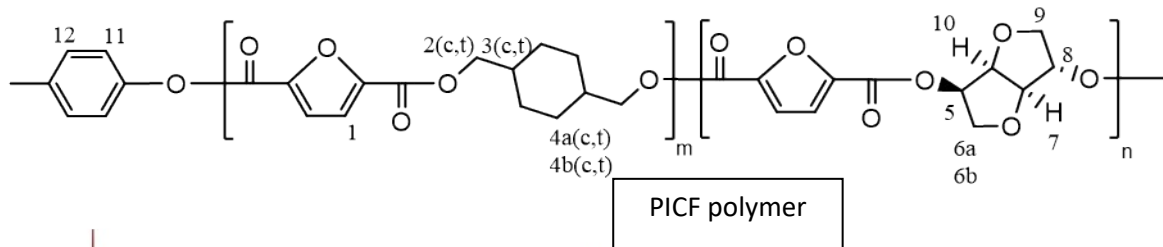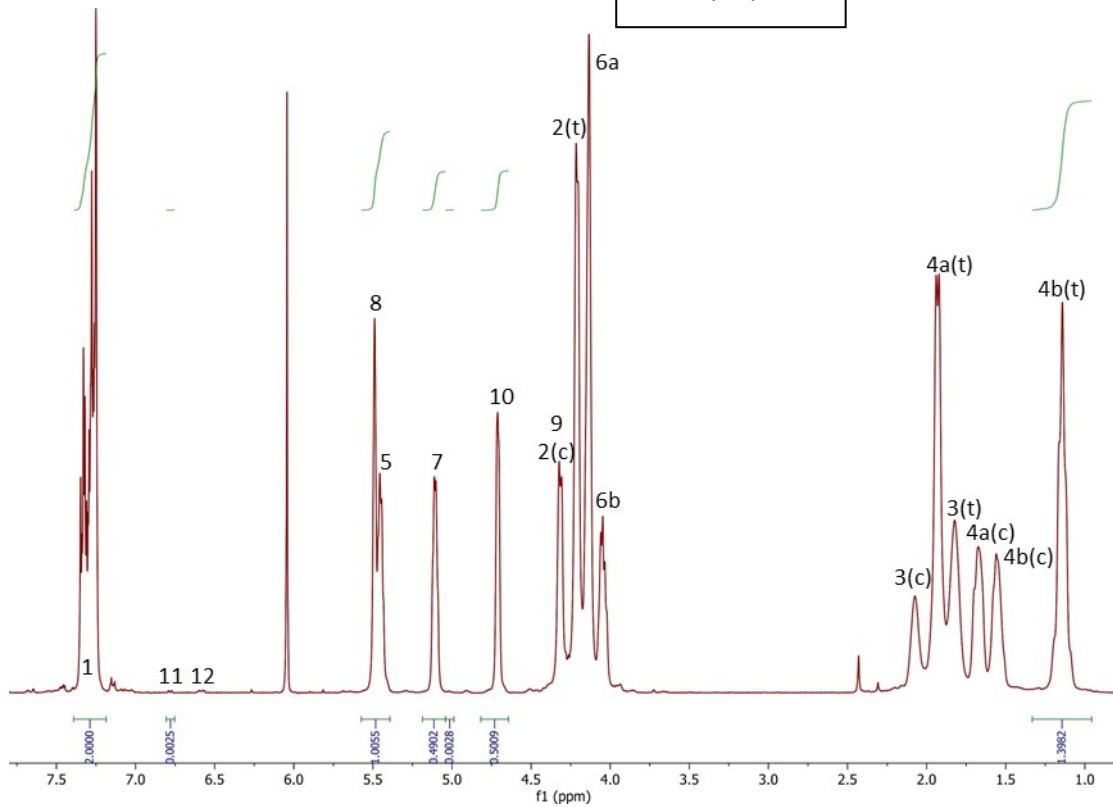

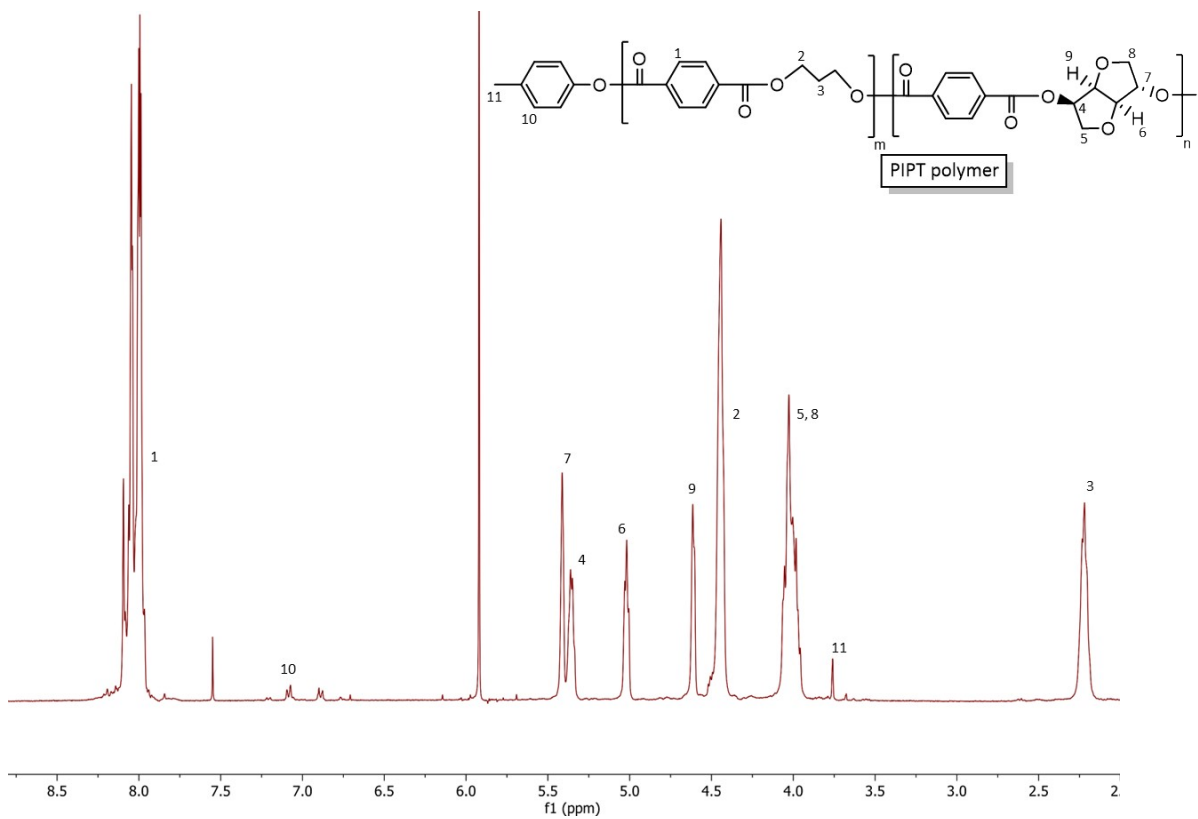

Figure 2 - Proton NMR of synthesized polyesters.

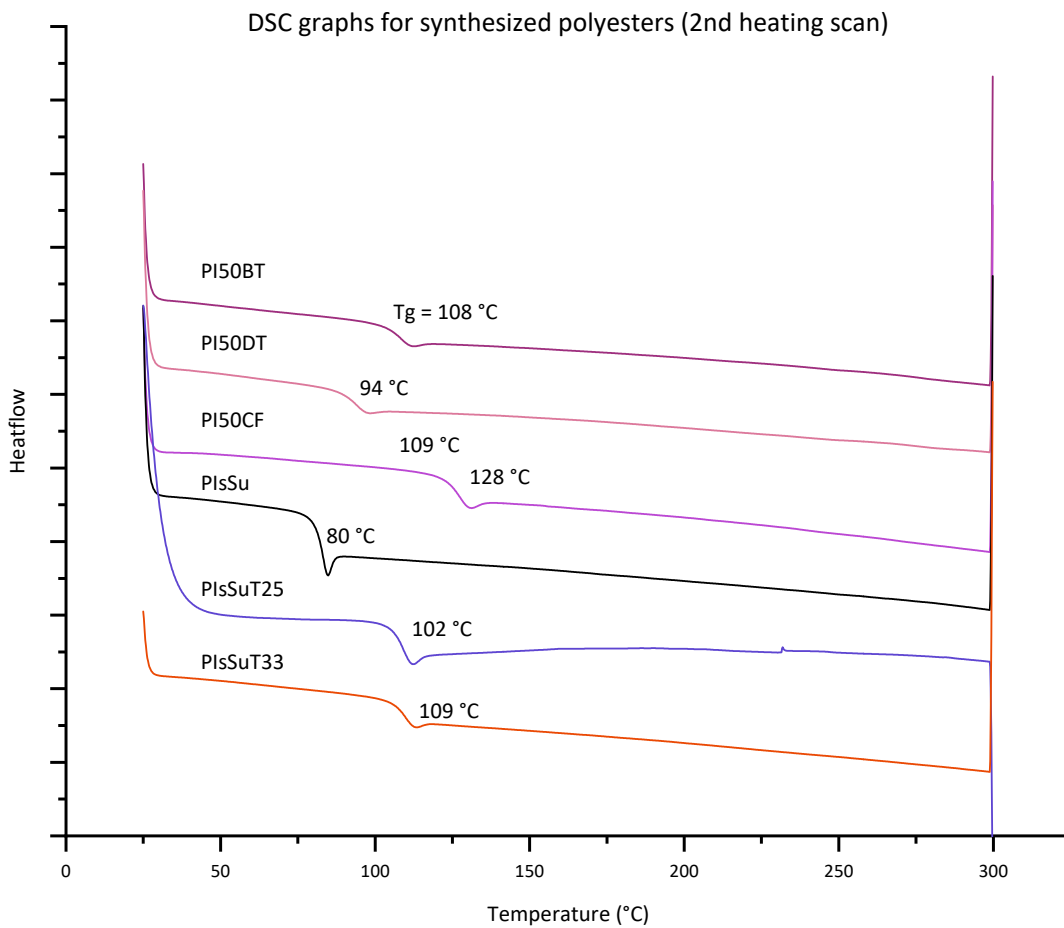

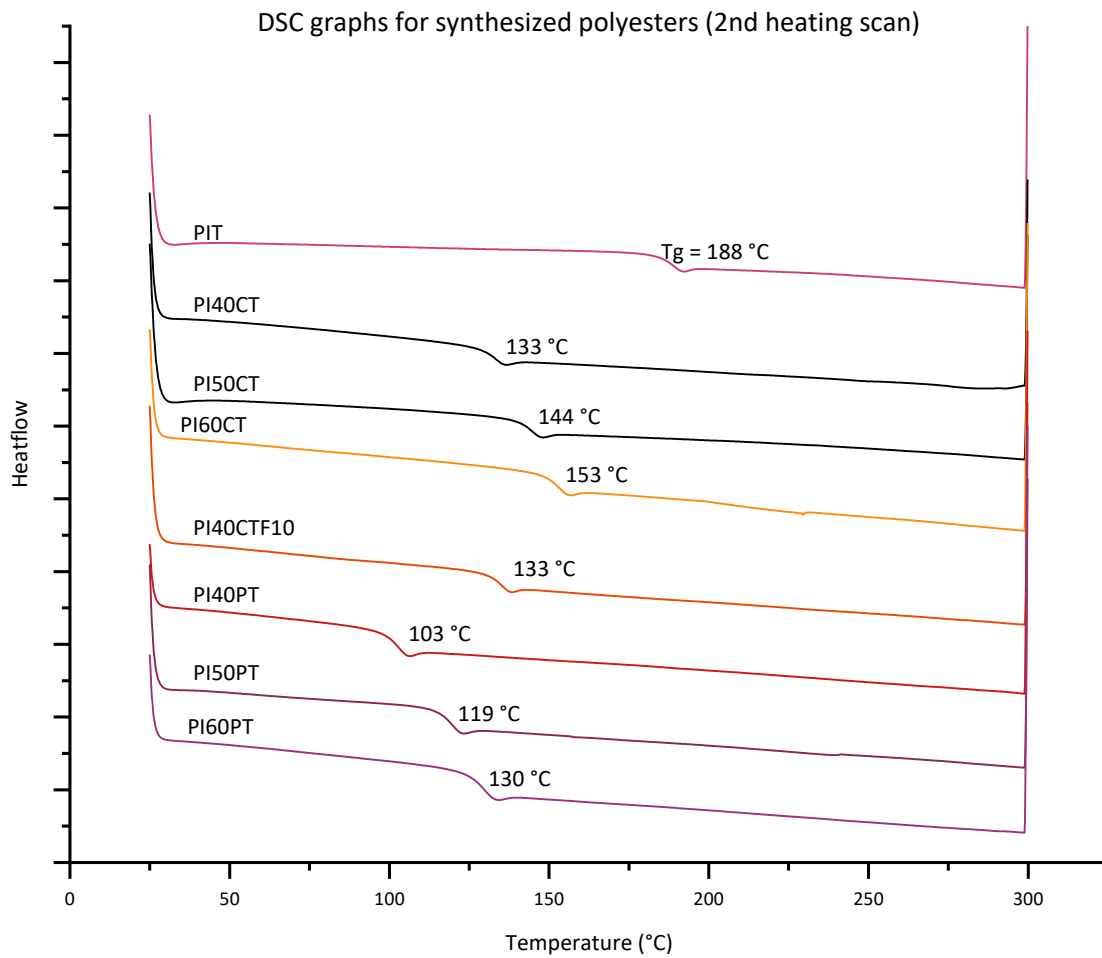

Figure 4 - DSC scans (2nd heating) for synthesized polyesters, with T<sub>g</sub> indicated.

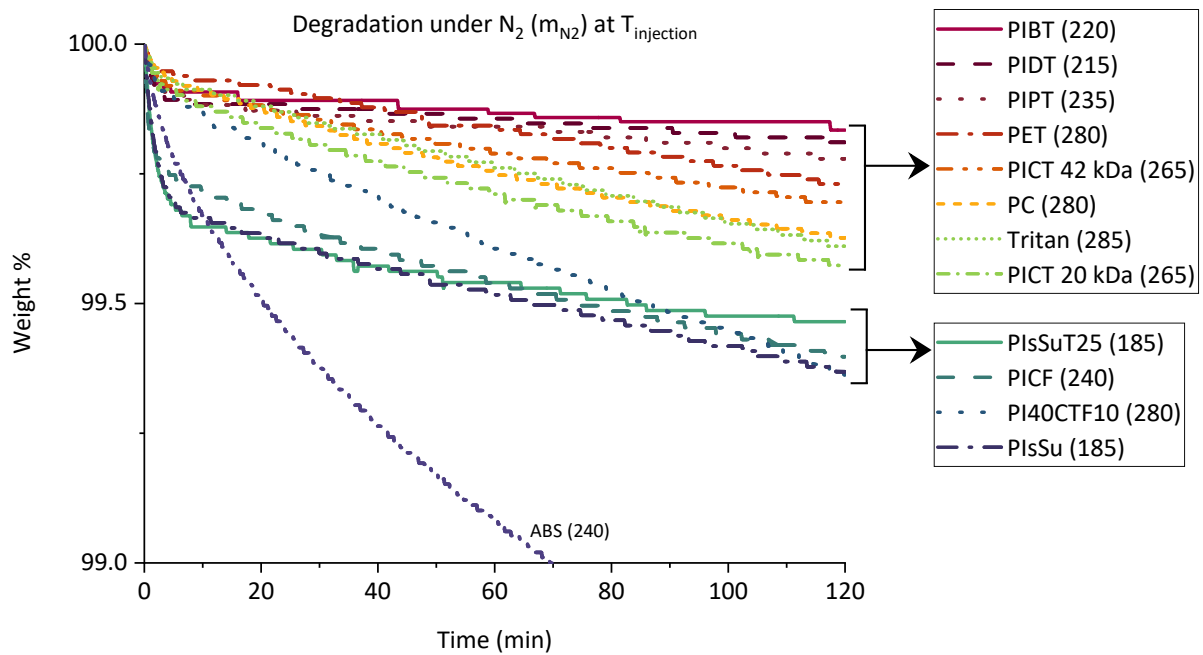

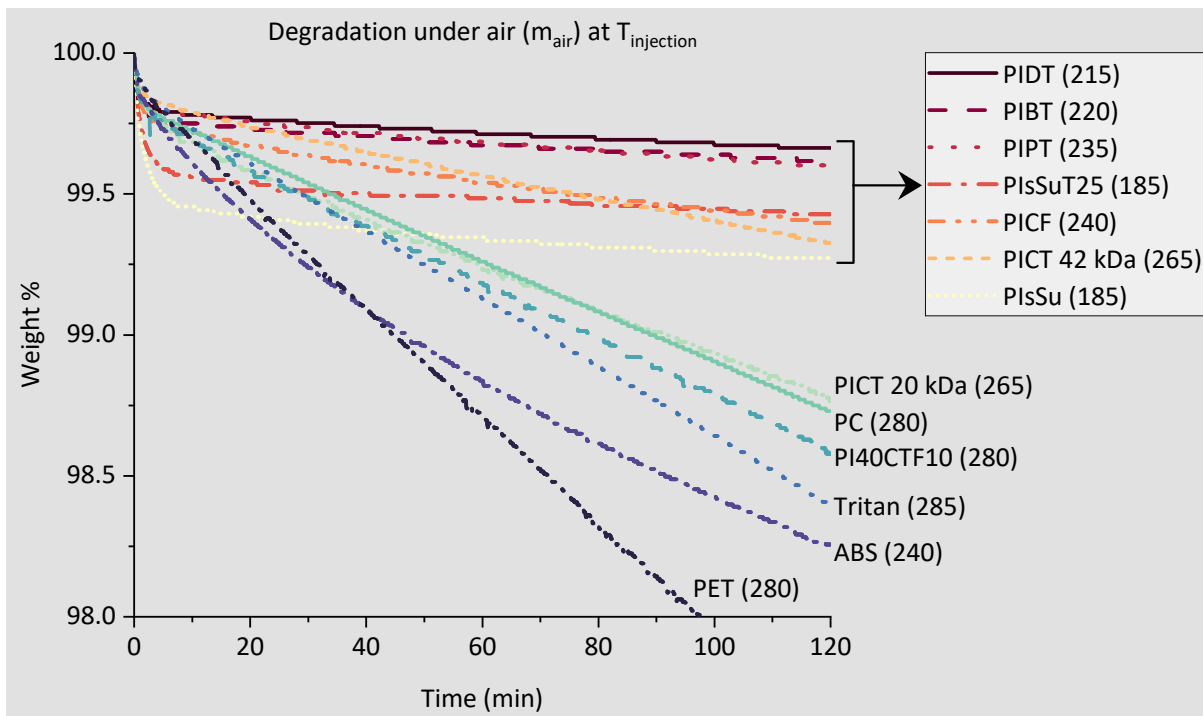

Figure 4 - TGA stability of samples under air (first graph) and nitrogen flow (second). Injection temperatures shown in brackets.

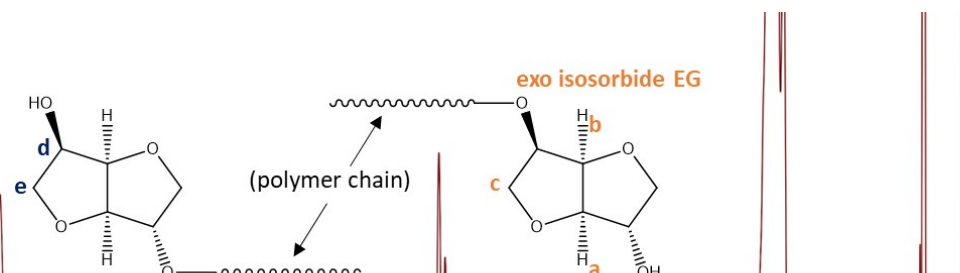

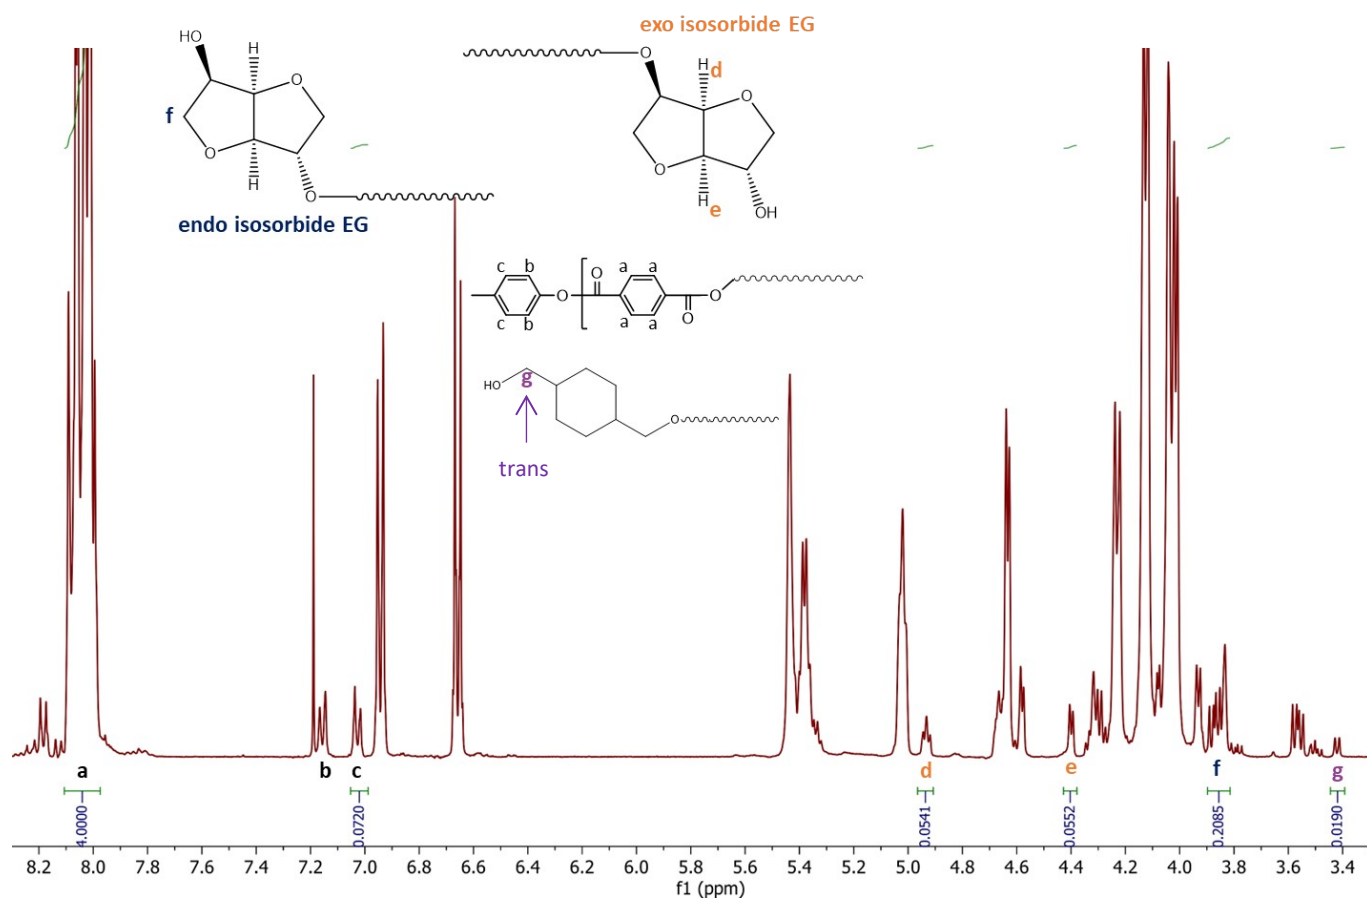

Figure 6 - End groups in PICT highlighted for calculation example. Same reaction as  $^{13}\text{C}$ -NMR spectrum, in autoclave with 0.3 equivalent of p-cresol. Current time: 18 h of esterification (pre-vacuum). The integrals are normalized in comparison to the terephthalate group at 8.1 ppm, with 4 protons. This image can be used as an example of the calculations presented in the paper: peak 'c' has 2 protons, so a total of 3.60 mol% of end groups of p-cresol relative to the repeat unit. Analogously, 'd' and 'e' have 1 proton each, totaling ~5.4 mol% of isorbide endo end groups and 'f' has two protons, which totals ~10.4 mol% of exo end groups – summing the two values, isorbide end groups represent ~15.8 mol% compared to the repeat unit. At last, 'g' has 2 protons for the trans CHDM phase (70% of total), so in total  $0.95 \text{ mol\%} / 70\% = 1.36 \text{ mol\%}$  total for CHDM.
